# Supplementary material for: Neoadjuvant chemoradiation alters biomarkers of anticancer immunotherapy responses in locally advanced rectal cancer
Source: PubMed Central journal article supplement (PMC7949478; doi:10.1136/jitc-2020-001610), 2021-03-10

## Supplementary figure 2A

**Up-regulated biological process after CRT**

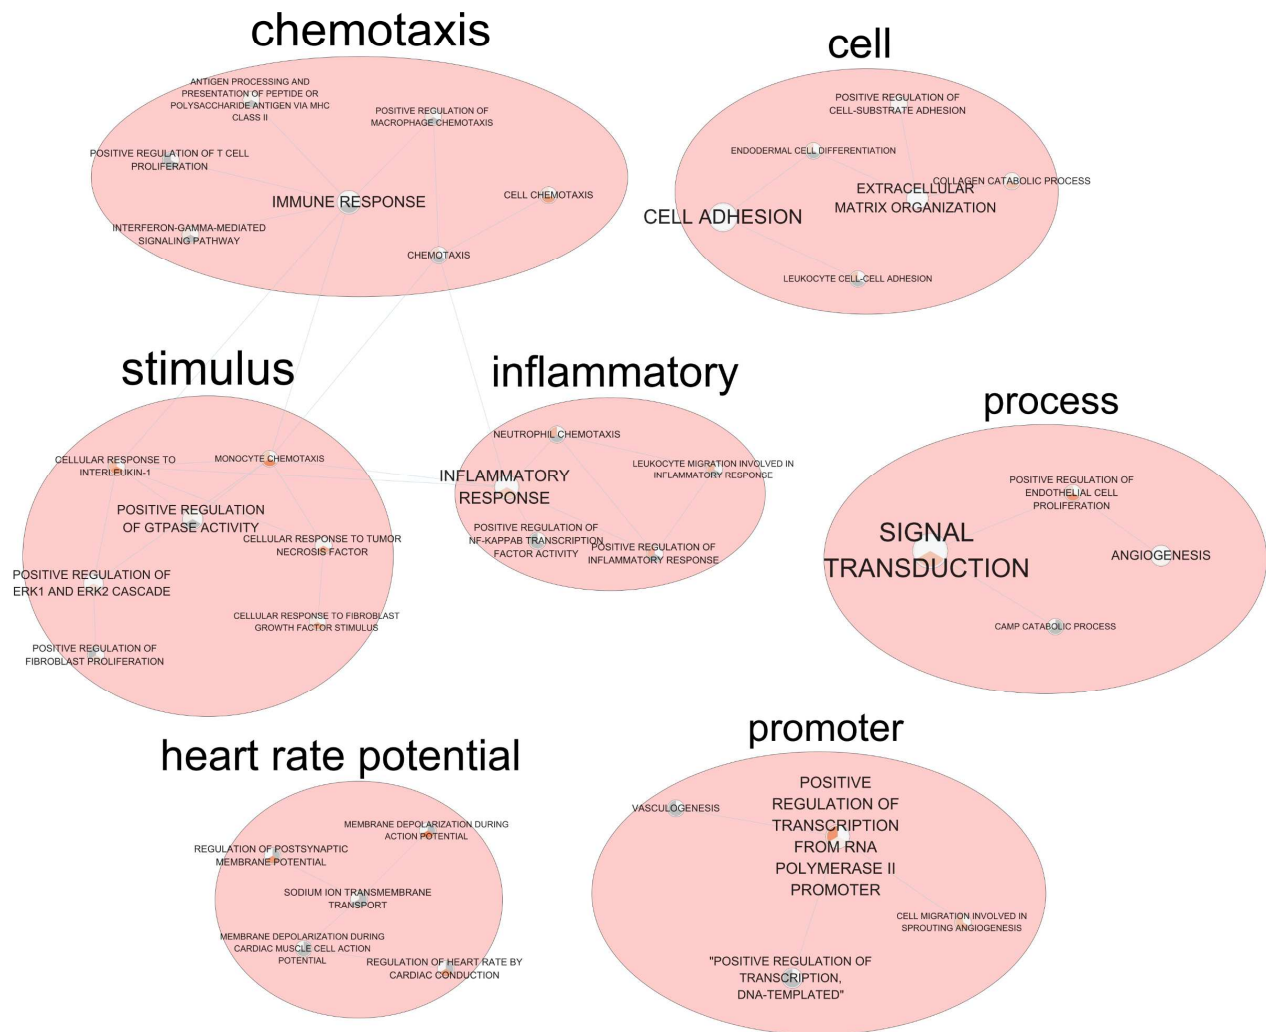

## Supplementary figure 2B

**Down-regulated biological process after CRT**

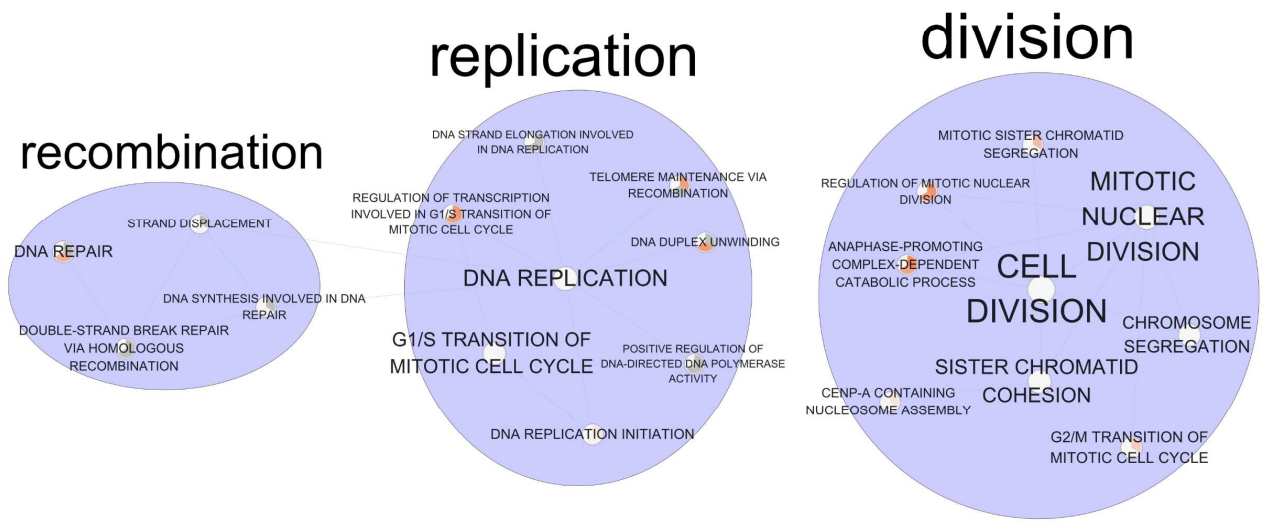

Supplementary figure 2C

RNAseq

GSE15781

GSE94104

KEGG\_FOCAL\_ADHESION

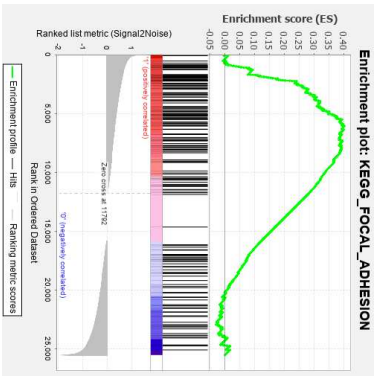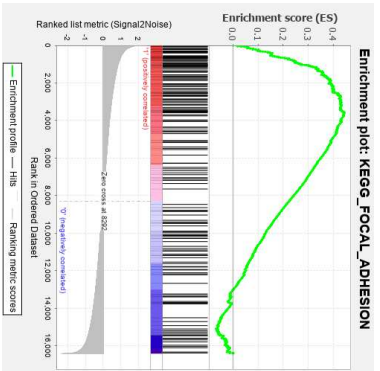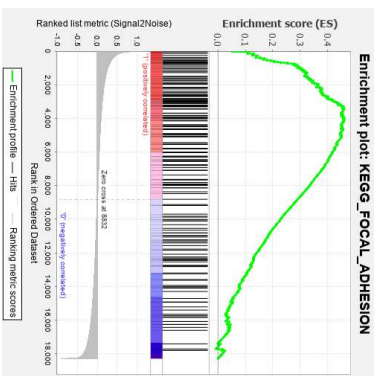

KEGG\_CELL\_ADHESION\_MOLECULES\_CAMS

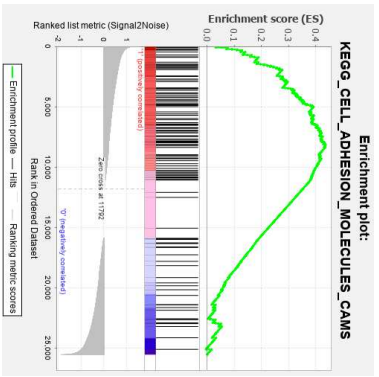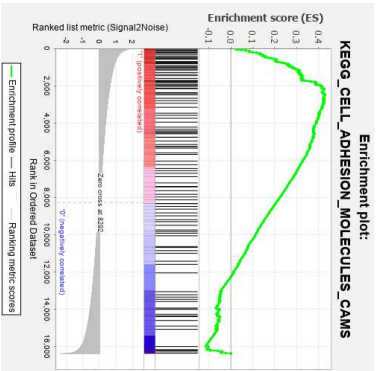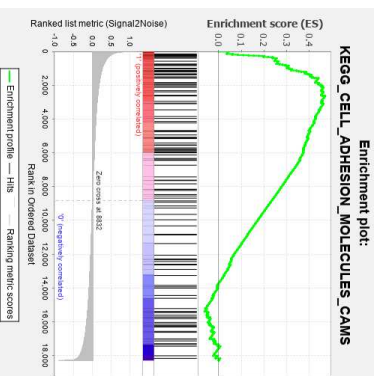

KEGG\_DNA\_REPLICATION

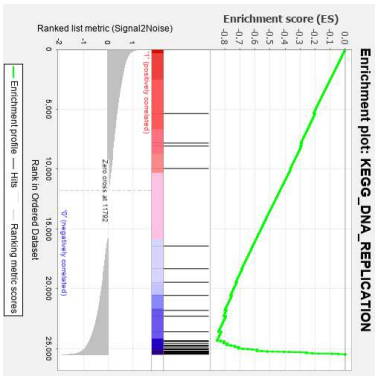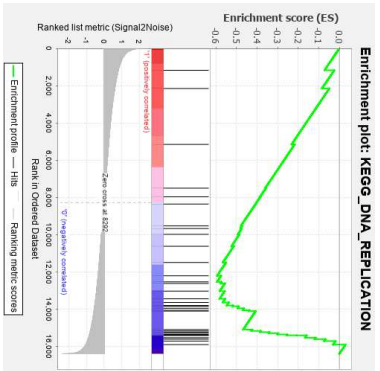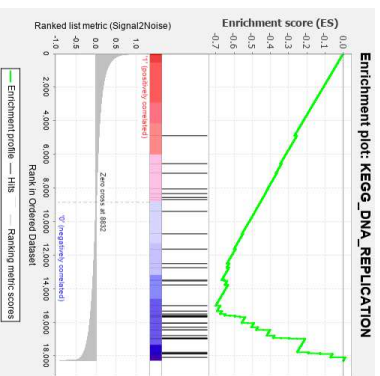

KEGG\_MISMATCH\_REPAIR

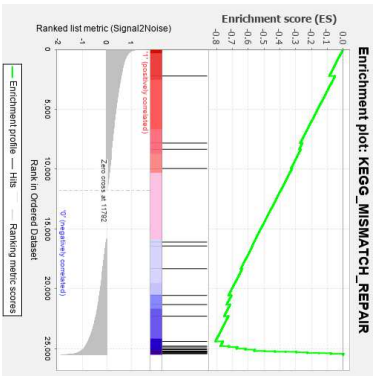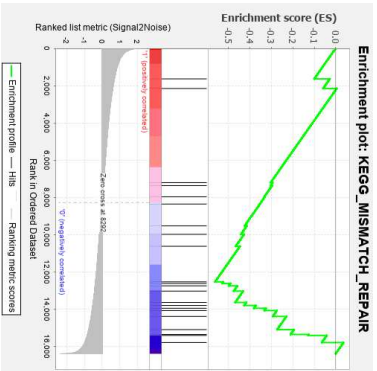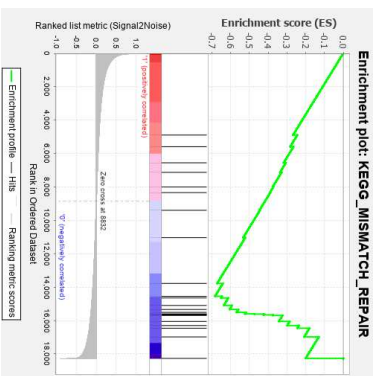

Supplement: jitc-2020-001610supp004.pdf [file jitc-2020-001610supp004.pdf]
