# Supplementary material for: Neoadjuvant chemoradiation alters biomarkers of anticancer immunotherapy responses in locally advanced rectal cancer
Source: PubMed Central journal article supplement (PMC7949478; doi:10.1136/jitc-2020-001610), 2021-03-10
Supplement: jitc-2020-001610supp001.pdf [file jitc-2020-001610supp001.pdf]

Supplementary Table 1. Characteristics and postoperative pathologic outcomes of patients in our LARC cohort

| Case_ID | Age | Sex | TRG Mandard_G | MSI Testing | BMI  | cT stage | ypT stage | cN stage | ypN stage | Differentiation | Tumor budding | Perineural invasion (PNI) | Extranodal tumor deposit | Exon 2 K-ras mutation | BRAF mutation |
|---------|-----|-----|---------------|-------------|------|----------|-----------|----------|-----------|-----------------|---------------|---------------------------|--------------------------|-----------------------|---------------|
| 1       | 69  | M   | NR            | L           | 23.9 | 2        | 1         | 1        | 0         | 1               | N             | N                         | N                        | Y                     | N             |
| 2       | 47  | M   | NR            | L           | 26.3 | 4        | 1         | 2        | 0         | 1               | N             | N                         | N                        | N                     | N             |
| 3       | 66  | M   | NR            | L           | 20.9 | 3        | 3         | 1        | 0         | 1               | N             | N                         | N                        | Y                     | N             |
| 4       | 72  | M   | R             | H           | 23.8 | 3        | 0         | 0        | 0         | 1               | N             | N                         | N                        | N                     | Y             |
| 5       | 67  | M   | NR            | L           | 26.2 | 3        | 3         | 2        | 0         | 1               | N             | Y                         | N                        | N                     | N             |
| 6       | 72  | M   | R             | L           | 19.5 | 3        | 0         | 1        | 0         | 1               | N             | N                         | N                        | Y                     | N             |
| 7       | 72  | M   | NR            | L           | 22.9 | 4        | 3         | 2        | 2         | 1               | N             | N                         | Y                        | N                     | N             |
| 8       | 55  | M   | R             | H           | 18.9 | 3        | 2         | 2        | 0         | 2               | N             | N                         | N                        | N                     | N             |
| 10      | 68  | M   | NR            | L           | 20.3 | 3        | 3         | 0        | 0         | 1               | Y             | N                         | N                        | N                     | N             |
| 12      | 54  | M   | R             | L           | 29.0 | 3        | 0         | 1        | 0         | 1               | N             | N                         | N                        | Y                     | N             |
| 14      | 76  | M   | NR            | L           | 21.3 | 3        | 3         | 2        | 1         | 1               | N             | N                         | N                        | N                     | N             |

M, male; R, response to neoadjuvant chemoradiation; NR, non-response to neoadjuvant chemoradiation; H, microsatellite instability-high; L, microsatellite instability-low; MSI, microsatellite instability; BMI, body mass index; cT, clinical primary tumor; ypT, posttreatment primary tumor; cN, clinical regional lymph node; ypN, posttreatment regional lymph node; LARC, locally advanced rectal cancer; N, no; Y, yes
