# Supplementary material for: Neoadjuvant chemoradiation alters biomarkers of anticancer immunotherapy responses in locally advanced rectal cancer
Source: PubMed Central journal article supplement (PMC7949478; doi:10.1136/jitc-2020-001610), 2021-03-10
Supplement: jitc-2020-001610supp002.pdf [file jitc-2020-001610supp002.pdf]

Supplementary Table 2. Read lengths.

| <b>ID</b> | <b>Raw reads</b> | <b>Reads after trimming</b> | <b>Mapped reads</b> |
|-----------|------------------|-----------------------------|---------------------|
| 1-PRERT   | 18,058,563       | 16,733,633 (92.66)          | 16,364,242 (97.79)  |
| 1-POSTRT  | 20,301,918       | 18,765,530 (92.43)          | 18,239,808 (97.20)  |
| 2-PRERT   | 16,825,688       | 15,542,904 (92.38)          | 15,178,983 (97.66)  |
| 2-POSTRT  | 18,838,467       | 17,544,965 (93.13)          | 17,072,947 (97.31)  |
| 3-PRERT   | 16,907,244       | 15,676,022 (92.72)          | 15,333,695 (97.82)  |
| 3-POSTRT  | 20,538,117       | 19,021,628 (92.62)          | 18,565,691 (97.60)  |
| 4-PRERT   | 18,861,843       | 17,519,576 (92.88)          | 17,175,773 (98.04)  |
| 4-POSTRT  | 19,061,963       | 17,662,984 (92.66)          | 17,254,851 (97.69)  |
| 5-PRERT   | 17,305,382       | 16,216,182 (93.71)          | 15,913,698 (98.13)  |
| 5-POSTRT  | 17,803,704       | 16,501,411 (92.69)          | 16,000,822 (96.97)  |
| 6-PRERT   | 18,461,008       | 16,971,725 (91.93)          | 16,609,666 (97.87)  |
| 6-POSTRT  | 19,629,324       | 18,158,133 (92.51)          | 17,711,303 (97.54)  |
| 7-PRERT   | 17,973,926       | 16,020,523 (89.13)          | 15,631,032 (97.57)  |
| 7-POSTRT  | 18,535,525       | 17,099,368 (92.25)          | 16,661,351 (97.44)  |
| 8-PRERT   | 17,792,102       | 16,057,480 (90.25)          | 15,706,844 (97.82)  |
| 8-POSTRT  | 17,698,298       | 16,334,788 (92.30)          | 15,803,813 (96.75)  |
| 10-PRERT  | 17,996,452       | 16,730,855 (92.97)          | 16,390,228 (97.96)  |
| 10-POSTRT | 19,363,116       | 17,885,076 (92.37)          | 17,454,124 (97.59)  |
| 12-PRERT  | 18,641,037       | 17,177,027 (92.15)          | 16,753,695 (97.54)  |
| 12-POSTRT | 16,671,573       | 13,756,025 (82.51)          | 13,098,322 (95.22)  |
| 14-PRERT  | 18,552,789       | 16,459,995 (88.72)          | 15,759,179 (95.74)  |
| 14-POSTRT | 21,771,211       | 20,579,574 (94.53)          | 20,220,822 (98.26)  |

Note: the minimum length of reads to be dropped was 38 bp.
