# Supplementary material for: Neoadjuvant chemoradiation alters biomarkers of anticancer immunotherapy responses in locally advanced rectal cancer
Source: PubMed Central journal article supplement (PMC7949478; doi:10.1136/jitc-2020-001610), 2021-03-10
Supplement: jitc-2020-001610supp003.pdf [file jitc-2020-001610supp003.pdf]

Supplementary Table 3. Number of variants called from each sample in our LARC cohort.

| <b>ID</b> | <b>No. of total variants</b> | <b>Common variants</b> | <b>Callable loci</b> | <b>TMB (somatic variants per Mbp)</b> |
|-----------|------------------------------|------------------------|----------------------|---------------------------------------|
| 1-PRERT   | 64,484                       | 39,143                 | 48,897,606           | 518.25                                |
| 1-POSTRT  | 80,526                       | 39,143                 | 55,051,650           | 751.71                                |
| 2-PRERT   | 63,193                       | 31,316                 | 47,655,625           | 668.90                                |
| 2-POSTRT  | 78,075                       | 31,316                 | 53,864,994           | 868.08                                |
| 3-PRERT   | 61,853                       | 33,744                 | 47,055,069           | 597.36                                |
| 3-POSTRT  | 78,569                       | 33,744                 | 53,810,905           | 833.01                                |
| 4-PRERT   | 61,386                       | 33,781                 | 46,184,868           | 597.71                                |
| 4-POSTRT  | 69,435                       | 33,781                 | 50,501,224           | 706.00                                |
| 5-PRERT   | 63,835                       | 32,970                 | 47,978,747           | 643.31                                |
| 5-POSTRT  | 69,500                       | 32,970                 | 49,766,227           | 734.03                                |
| 6-PRERT   | 66,198                       | 35,764                 | 50,631,976           | 601.08                                |
| 6-POSTRT  | 70,490                       | 35,764                 | 50,129,685           | 692.72                                |
| 7-PRERT   | 62,945                       | 36,842                 | 47,746,549           | 546.70                                |
| 7-POSTRT  | 72,143                       | 36,842                 | 52,064,400           | 678.03                                |
| 8-PRERT   | 45,503                       | 27,090                 | 38,551,811           | 477.62                                |
| 8-POSTRT  | 64,777                       | 27,090                 | 47,335,812           | 796.16                                |
| 10-PRERT  | 69,064                       | 38,430                 | 51,882,343           | 590.45                                |
| 10-POSTRT | 73,558                       | 38,430                 | 54,195,701           | 648.17                                |
| 12-PRERT  | 56,591                       | 25,743                 | 42,621,344           | 723.77                                |
| 12-POSTRT | 58,303                       | 25,743                 | 44,070,288           | 738.82                                |
| 14-PRERT  | 62,445                       | 27,241                 | 41,921,885           | 839.75                                |
| 14-POSTRT | 60,936                       | 27,241                 | 43,213,310           | 779.74                                |

LARC, locally advanced rectal cancer; Mbp, million base pairs; TMB, tumor mutational burden
