# Supplementary material for: Neoadjuvant chemoradiation alters biomarkers of anticancer immunotherapy responses in locally advanced rectal cancer
Source: PubMed Central journal article supplement (PMC7949478; doi:10.1136/jitc-2020-001610), 2021-03-10
Supplement: jitc-2020-001610supp005.pdf [file jitc-2020-001610supp005.pdf]

Supplementary Table 4. Significantly enriched biological processes in GSEA of the three cohorts.

Supplementary Table 4-1. Significantly enriched biological processes in GSEA of the RNA-seq cohort

| Biological process                                   | Size | ES         | NES        | Nom <i>p</i> value | FDR q-value | FWER <i>p</i> value |
|------------------------------------------------------|------|------------|------------|--------------------|-------------|---------------------|
| DILATED_CARDIOMYOPATHY                               | 90   | 0.5125893  | 1.9825155  | 0                  | 0.006476901 | 0.006               |
| CALCIUM_SIGNALING_PATHWAY                            | 175  | 0.46418902 | 1.9757535  | 0                  | 0.003748867 | 0.007               |
| HYPERTROPHIC_CARDIOMYOPATHY_HCM                      | 83   | 0.50671226 | 1.908026   | 0                  | 0.007400138 | 0.021               |
| HEMATOPOIETIC_CELL_LINEAGE                           | 86   | 0.4956405  | 1.8727208  | 0                  | 0.008608614 | 0.032               |
| VASCULAR_SMOOTH_MUSCLE_CONTRACTION                   | 114  | 0.4644208  | 1.8658024  | 0                  | 0.006886891 | 0.032               |
| ARRHYTHMOGENIC_RIGHT_VENTRICULAR_CARDIOMYOPATHY_ARVC | 74   | 0.49870643 | 1.8555245  | 0                  | 0.007351546 | 0.041               |
| ECM_RECEPTOR_INTERACTION                             | 84   | 0.4827511  | 1.8464414  | 0                  | 0.007072384 | 0.046               |
| ASTHMA                                               | 30   | 0.6003459  | 1.8422378  | 0                  | 0.006594927 | 0.049               |
| GRAFT_VERSUS_HOST_DISEASE                            | 41   | 0.5428953  | 1.7973992  | 0                  | 0.010876824 | 0.09                |
| AUTOIMMUNE_THYROID_DISEASE                           | 51   | 0.51586497 | 1.7940958  | 0                  | 0.010505675 | 0.097               |
| CELL_ADHESION_MOLECULES_CAMS                         | 130  | 0.43658504 | 1.7939343  | 0                  | 0.009550614 | 0.097               |
| NEUROACTIVE_LIGAND_RECEPTOR_INTERACTION              | 270  | 0.3942687  | 1.7656447  | 0                  | 0.012545356 | 0.14                |
| REGULATION_OF_AUTOPHAGY                              | 34   | 0.5398197  | 1.7385498  | 0.003824092        | 0.01590422  | 0.186               |
| FOCAL_ADHESION                                       | 197  | 0.4028898  | 1.7380211  | 0                  | 0.014768204 | 0.186               |
| ALLOGRAFT_REJECTION                                  | 37   | 0.5302213  | 1.7213805  | 0.001934236        | 0.016476285 | 0.217               |
| LONG_TERM_DEPRESSION                                 | 70   | 0.46136054 | 1.7079692  | 0                  | 0.017353414 | 0.238               |
| LONG_TERM_POTENTIATION                               | 70   | 0.43724975 | 1.6331328  | 0.003816794        | 0.03305391  | 0.419               |
| OLFACTORY_TRANSDUCTION                               | 379  | 0.35552466 | 1.6294472  | 0                  | 0.032004103 | 0.428               |
| SPLICEOSOME                                          | 125  | -0.6826143 | -2.7658868 | 0                  | 0           | 0                   |
| DNA_REPLICATION                                      | 36   | -0.8515296 | -2.7587698 | 0                  | 0           | 0                   |

|                                            |     |             |            |             |             |       |
|--------------------------------------------|-----|-------------|------------|-------------|-------------|-------|
| CELL_CYCLE                                 | 124 | -0.6641761  | -2.6726406 | 0           | 0           | 0     |
| RIBOSOME                                   | 84  | -0.66559803 | -2.5256746 | 0           | 0           | 0     |
| BASE_EXCISION_REPAIR                       | 33  | -0.7684398  | -2.4396727 | 0           | 0           | 0     |
| PROTEASOME                                 | 43  | -0.7071348  | -2.4239998 | 0           | 0           | 0     |
| MISMATCH_REPAIR                            | 23  | -0.80656695 | -2.3662093 | 0           | 0           | 0     |
| AMINOACYL_TRNA_BIOSYNTHESIS                | 39  | -0.7060635  | -2.3642282 | 0           | 0           | 0     |
| HOMOLOGOUS_RECOMBINATION                   | 26  | -0.77329946 | -2.327796  | 0           | 0           | 0     |
| PYRIMIDINE_METABOLISM                      | 97  | -0.58644736 | -2.3116546 | 0           | 0           | 0     |
| RNA_POLYMERASE                             | 29  | -0.73242897 | -2.261553  | 0           | 0           | 0     |
| RNA_DEGRADATION                            | 53  | -0.620992   | -2.1442883 | 0           | 0           | 0     |
| NUCLEOTIDE_EXCISION_REPAIR                 | 44  | -0.617002   | -2.063633  | 0           | 0           | 0     |
| N_GLYCAN_BIOSYNTHESIS                      | 46  | -0.5494952  | -1.8698767 | 0           | 0.002188098 | 0.032 |
| ALANINE_ASPARTATE_AND_GLYTAMATE_METABOLISM | 31  | -0.5881689  | -1.8669325 | 0           | 0.002169371 | 0.034 |
| CYSTEINE_AND_METHIONINE_METABOLISM         | 34  | -0.57071894 | -1.8656715 | 0           | 0.002088731 | 0.035 |
| PURINE_METABOLISM                          | 155 | -0.43708715 | -1.8541654 | 0           | 0.002225027 | 0.04  |
| OOCYTE_MEIOSIS                             | 111 | -0.45886746 | -1.832368  | 0           | 0.002783426 | 0.052 |
| BASAL_TRANSCRIPTION_FACTORS                | 35  | -0.5689937  | -1.8084297 | 0.002066116 | 0.003596376 | 0.07  |
| SELENOAMINO_ACID_METABOLISM                | 25  | -0.6029439  | -1.8009231 | 0           | 0.003688005 | 0.076 |
| PENTOSE_PHOSPHATE_PATHWAY                  | 26  | -0.57771033 | -1.7341917 | 0.004166667 | 0.007883973 | 0.162 |
| PROGESTERONE_MEDIATED_OOCYTE_MATURATION    | 85  | -0.44431958 | -1.6868293 | 0.002118644 | 0.012527867 | 0.26  |
| GLYOXYLATE_AND_DICARBOXYLATE_METABOLISM    | 16  | -0.6329198  | -1.6816388 | 0.012552301 | 0.012731631 | 0.274 |
| PEROXISOME                                 | 78  | -0.43489367 | -1.6427    | 0.00212766  | 0.018011903 | 0.377 |
| ONE_CARBON_POOL_BY_FOLATE                  | 17  | -0.59410673 | -1.6189371 | 0.018907564 | 0.02206849  | 0.445 |
| STEROID_BIOSYNTHESIS                       | 16  | -0.5842019  | -1.557012  | 0.03050109  | 0.035570364 | 0.638 |
| HUNTINGTONS_DISEASE                        | 160 | -0.364217   | -1.5333275 | 0           | 0.0424422   | 0.719 |
| CITRATE_CYCLE_TCA_CYCLE                    | 30  | -0.48704192 | -1.5312638 | 0.01629328  | 0.041356437 | 0.724 |

ES, enrichment score; FDR, false-discovery rate; FWER, familywise-error rate; GSEA, gene set enrichment analysis; NES, normalized

enrichment score

Supplementary Table 4-2. Significantly enriched biological processes in GSEA in the GSE15781 cohort

| Biological process                                 | Size | ES         | NES       | Nom <i>p</i> value | FDR <i>q</i> -value | FWER <i>p</i> value |
|----------------------------------------------------|------|------------|-----------|--------------------|---------------------|---------------------|
| ASTHMA                                             | 28   | 0.73588747 | 2.5179844 | 0                  | 0                   | 0                   |
| ALLOGRAFT_REJECTION                                | 32   | 0.72345424 | 2.498432  | 0                  | 0                   | 0                   |
| GRAFT_VERSUS_HOST_DISEASE                          | 34   | 0.68916994 | 2.3831823 | 0                  | 0                   | 0                   |
| LEISHMANIA_INFECTION                               | 64   | 0.58616734 | 2.3514082 | 0                  | 0                   | 0                   |
| INTESTINAL_IMMUNE_NETWORK_FOR_IGA_PRODUCTION       | 42   | 0.6263371  | 2.304866  | 0                  | 0                   | 0                   |
| COMPLEMENT_AND_COAGULATION_CASCADES                | 63   | 0.577753   | 2.2939477 | 0                  | 0                   | 0                   |
| GLYCOSAMINOGLYCAN_BIOSYNTHESIS_CHONDROITIN_SULFATE | 19   | 0.7334301  | 2.2069645 | 0                  | 0                   | 0                   |
| AUTOIMMUNE_THYROID_DISEASE                         | 46   | 0.5839816  | 2.1899981 | 0                  | 0                   | 0                   |
| FOCAL_ADHESION                                     | 186  | 0.445508   | 2.1271925 | 0                  | 2.17E-04            | 0.002               |
| ECM_RECEPTOR_INTERACTION                           | 77   | 0.5060727  | 2.0891776 | 0                  | 1.96E-04            | 0.002               |
| VIRAL_MYOCARDITIS                                  | 63   | 0.5139724  | 2.016566  | 0                  | 8.57E-04            | 0.01                |
| CYTOKINE_CYTOKINE_RECEPTOR_INTERACTION             | 243  | 0.41357958 | 2.0133467 | 0                  | 8.63E-04            | 0.011               |
| HEMATOPOIETIC_CELL_LINEAGE                         | 80   | 0.48226136 | 1.9927986 | 0                  | 0.001312858         | 0.018               |
| CELL_ADHESION_MOLECULES_CAMS                       | 122  | 0.4314273  | 1.9497426 | 0                  | 0.002034219         | 0.03                |
| TYPE_I_DIABETES_MELLITUS                           | 38   | 0.53817123 | 1.9339674 | 0                  | 0.002226526         | 0.034               |
| SNARE_INTERACTIONS_IN_VESICULAR_TRANSPORT          | 35   | 0.5134649  | 1.8601531 | 0                  | 0.004540115         | 0.07                |
| VASCULAR_SMOOTH_MUSCLE_CONTRACTION                 | 103  | 0.43035984 | 1.8598087 | 0                  | 0.00427305          | 0.07                |
| CHEMOKINE_SIGNALING_PATHWAY                        | 172  | 0.39330772 | 1.8331753 | 0                  | 0.005704433         | 0.098               |

|                                                            |     |             |            |             |             |       |
|------------------------------------------------------------|-----|-------------|------------|-------------|-------------|-------|
| LEUKOCYTE_TRANSENDOTHELIAL_MIGRATION                       | 106 | 0.4017337   | 1.7941904  | 0           | 0.008774756 | 0.155 |
| SYSTEMIC_LUPUS_ERYTHEMATOSUS                               | 106 | 0.390597    | 1.7322614  | 0           | 0.013767486 | 0.249 |
| NOD_LIKE_RECEPTOR_SIGNALING_PATHWAY                        | 62  | 0.43366337  | 1.7293886  | 0           | 0.013427097 | 0.253 |
| PRION_DISEASES                                             | 35  | 0.4806068   | 1.6911408  | 0.003875969 | 0.018698048 | 0.351 |
| GLYCOSPHINGOLIPID_BIOSYNTHESIS_GANGLIO_SERIES              | 15  | 0.60667235  | 1.6904539  | 0.0056926   | 0.018050753 | 0.352 |
| MAPK_SIGNALING_PATHWAY                                     | 253 | 0.3397241   | 1.6634429  | 0           | 0.022204485 | 0.435 |
| REGULATION_OF_ACTIN_CYTOSKELETON                           | 195 | 0.33810678  | 1.6221337  | 0           | 0.03071796  | 0.564 |
| HYPERTROPHIC_CARDIOMYOPATHY_HCM                            | 79  | 0.38849574  | 1.6161528  | 0.003546099 | 0.031022798 | 0.578 |
| EPITHELIAL_CELL_SIGNALING_IN_HELICOBACTER_PYLORI_INFECTION | 66  | 0.39971268  | 1.5803355  | 0.01934236  | 0.04046661  | 0.697 |
| NATURAL_KILLER_CELL_MEDIATED_CYTOTOXICITY                  | 123 | 0.3486758   | 1.5708547  | 0           | 0.042244826 | 0.726 |
| MELANOMA                                                   | 69  | 0.38169178  | 1.5702761  | 0.009578544 | 0.041019298 | 0.728 |
| NEUROTROPHIN_SIGNALING_PATHWAY                             | 120 | 0.35502195  | 1.57002    | 0.003649635 | 0.03977624  | 0.729 |
| RIG_I_LIKE_RECEPTOR_SIGNALING_PATHWAY                      | 64  | 0.39188373  | 1.5609279  | 0.013916501 | 0.041359786 | 0.756 |
| DILATED_CARDIOMYOPATHY                                     | 85  | 0.36926553  | 1.5565197  | 0.007648184 | 0.041745313 | 0.774 |
| PATHWAYS_IN_CANCER                                         | 316 | 0.30397028  | 1.5490415  | 0           | 0.042838704 | 0.788 |
| ANTIGEN_PROCESSING_AND_PRESENTATION                        | 76  | 0.37691656  | 1.5369248  | 0.007462686 | 0.046710495 | 0.825 |
| LYSOSOME                                                   | 115 | 0.34756178  | 1.5245861  | 0.007490637 | 0.049622618 | 0.847 |
| TOLL_LIKE_RECEPTOR_SIGNALING_PATHWAY                       | 100 | 0.35285708  | 1.5229201  | 0.001901141 | 0.048963655 | 0.848 |
| CITRATE_CYCLE_TCA_CYCLE                                    | 30  | -0.62892634 | -2.1918447 | 0           | 0           | 0     |
| AMINOACYL_TRNA_BIOSYNTHESIS                                | 32  | -0.60830474 | -2.1323717 | 0           | 0           | 0     |
| DNA_REPLICATION                                            | 33  | -0.5951376  | -2.1039531 | 0           | 0           | 0     |
| BASE_EXCISION_REPAIR                                       | 33  | -0.58671963 | -2.035338  | 0           | 0.001006253 | 0.004 |
| PYRIMIDINE_METABOLISM                                      | 90  | -0.46414363 | -2.0068944 | 0           | 0.001411438 | 0.007 |
| SPLICEOSOME                                                | 113 | -0.44299504 | -1.9966822 | 0           | 0.00172984  | 0.01  |
| DRUG_METABOLISM_OTHER_ENZYMES                              | 39  | -0.52041477 | -1.8975196 | 0           | 0.006189106 | 0.04  |
| STEROID_BIOSYNTHESIS                                       | 16  | -0.6416227  | -1.8479576 | 0.002132196 | 0.010840432 | 0.079 |

|                                                         |     |             |            |             |             |       |
|---------------------------------------------------------|-----|-------------|------------|-------------|-------------|-------|
| PEROXISOME                                              | 75  | -0.43664226 | -1.8302426 | 0           | 0.012082151 | 0.098 |
| RNA_POLYMERASE                                          | 26  | -0.550258   | -1.7956698 | 0.011857707 | 0.015288933 | 0.13  |
| VALINE_LEUCINE_AND_ISOLEUCINE_DEGRADATION               | 42  | -0.47456235 | -1.7846826 | 0.004140787 | 0.015903868 | 0.149 |
| MISMATCH_REPAIR                                         | 22  | -0.5634375  | -1.7611866 | 0.002079002 | 0.018849427 | 0.191 |
| TERPENOID_BACKBONE_BIOSYNTHESIS                         | 15  | -0.6244792  | -1.7600522 | 0.006147541 | 0.017642075 | 0.192 |
| ALANINE_ASPARTATE_AND_Glutamate_METABOLISM              | 31  | -0.4917142  | -1.7519854 | 0.004338395 | 0.017693076 | 0.204 |
| CELL_CYCLE                                              | 122 | -0.3796363  | -1.74143   | 0           | 0.018191693 | 0.224 |
| SELENOAMINO_ACID_METABOLISM                             | 21  | -0.53938395 | -1.7279283 | 0.010416667 | 0.018887721 | 0.246 |
| RIBOSOME                                                | 75  | -0.40516287 | -1.7208233 | 0           | 0.018710503 | 0.259 |
| PARKINSONS_DISEASE                                      | 97  | -0.39299116 | -1.7123795 | 0           | 0.019501364 | 0.278 |
| GLYCOPHINGOLIPID_BIOSYNTHESIS_LACTO_AND_NEOLACTO_SERIES | 26  | -0.5284643  | -1.7038212 | 0.008639309 | 0.019893743 | 0.295 |
| GLUTATHIONE_METABOLISM                                  | 44  | -0.44670752 | -1.6992595 | 0           | 0.019898029 | 0.312 |
| HUNTINGTONS_DISEASE                                     | 150 | -0.35769758 | -1.6822829 | 0           | 0.021907598 | 0.348 |
| PROXIMAL_TUBULE_BICARBONATE_RECLAMATION                 | 23  | -0.5226012  | -1.6757207 | 0.015151516 | 0.02179761  | 0.359 |
| PROPANOATE_METABOLISM                                   | 30  | -0.46956128 | -1.6182915 | 0.00631579  | 0.034719527 | 0.525 |
| THYROID_CANCER                                          | 28  | -0.4587294  | -1.5823514 | 0.022177419 | 0.045327876 | 0.643 |

ES, enrichment score; FDR, false-discovery rate; FWER, familywise-error rate; GSEA, gene set enrichment analysis; NES, normalized enrichment score

Supplementary Table 4-3. Significantly enriched biological processes in GSEA in the GSE94104 cohort

| Biological process | Size | ES | NES | Nom <i>p</i> value | FDR q-value | FWER <i>p</i> value |
|--------------------|------|----|-----|--------------------|-------------|---------------------|
|--------------------|------|----|-----|--------------------|-------------|---------------------|

|                                                      |     |             |            |             |             |       |
|------------------------------------------------------|-----|-------------|------------|-------------|-------------|-------|
| DILATED_CARDIOMYOPATHY                               | 86  | 0.5738871   | 2.09093    | 0           | 9.49E-04    | 0.001 |
| MELANOMA                                             | 67  | 0.58874094  | 2.0711582  | 0           | 9.36E-04    | 0.002 |
| HYPERTROPHIC_CARDIOMYOPATHY_HCM                      | 79  | 0.56813705  | 2.0289567  | 0           | 6.24E-04    | 0.002 |
| CALCIUM_SIGNALING_PATHWAY                            | 162 | 0.49308497  | 1.9452127  | 0           | 0.003931471 | 0.016 |
| ECM_RECEPTOR_INTERACTION                             | 82  | 0.53636074  | 1.9236966  | 0           | 0.004036177 | 0.021 |
| FOCAL_ADHESION                                       | 189 | 0.46129414  | 1.8581474  | 0           | 0.008099408 | 0.051 |
| ARRHYTHMOGENIC_RIGHT_VENTRICULAR_CARDIOMYOPATHY_ARVC | 71  | 0.5191158   | 1.8241311  | 0.00170068  | 0.010827938 | 0.077 |
| CELL_ADHESION_MOLECULES_CAMS                         | 131 | 0.46934408  | 1.8116379  | 0           | 0.011433065 | 0.092 |
| VIRAL_MYOCARDITIS                                    | 63  | 0.5030668   | 1.7179166  | 0.001814882 | 0.03081232  | 0.266 |
| DNA_REPLICATION                                      | 36  | -0.7007715  | -2.3010209 | 0           | 0           | 0     |
| CELL_CYCLE                                           | 122 | -0.57120323 | -2.295487  | 0           | 0           | 0     |
| MISMATCH_REPAIR                                      | 23  | -0.6837358  | -2.020403  | 0           | 7.03E-04    | 0.002 |
| PEROXISOME                                           | 75  | -0.5047265  | -1.8933221 | 0           | 0.005765674 | 0.021 |
| ASCORBATE_AND_ALDARATE_METABOLISM                    | 20  | -0.6515238  | -1.8501037 | 0           | 0.008128142 | 0.037 |
| BASE_EXCISION_REPAIR                                 | 33  | -0.57392    | -1.8270599 | 0.002352941 | 0.008980554 | 0.047 |
| MATURITY_ONSET_DIABETES_OF_THE_YOUNG                 | 22  | -0.62876385 | -1.8215218 | 0.002173913 | 0.008178297 | 0.05  |
| RIBOSOME                                             | 81  | -0.46520224 | -1.7553846 | 0           | 0.016389811 | 0.112 |
| HOMOLOGOUS_RECOMBINATION                             | 28  | -0.57828945 | -1.7548293 | 0.002159827 | 0.014813413 | 0.114 |
| PENTOSE_AND_GLUCURONATE_INTERCONVERSIONS             | 23  | -0.59495944 | -1.7142693 | 0.002257336 | 0.0222204   | 0.181 |
| PORPHYRIN_AND_CHLOROPHYLL_METABOLISM                 | 34  | -0.5163599  | -1.672384  | 0.011185682 | 0.03282529  | 0.276 |
| RIBOFLAVIN_METABOLISM                                | 16  | -0.6053013  | -1.637684  | 0.018907564 | 0.04302932  | 0.371 |
| FRUCTOSE_AND_MANNOSE_METABOLISM                      | 34  | -0.5114403  | -1.6306827 | 0.013157895 | 0.042943906 | 0.394 |
| DRUG_METABOLISM_OTHER_ENZYMES                        | 41  | -0.48197663 | -1.6222355 | 0.004237288 | 0.04386709  | 0.425 |

ES, enrichment score; FDR, false-discovery rate; FWER, familywise-error rate; GSEA, gene set enrichment analysis; NES, normalized

enrichment score
