# Supplementary material for: Neoadjuvant chemoradiation alters biomarkers of anticancer immunotherapy responses in locally advanced rectal cancer
Source: PubMed Central journal article supplement (PMC7949478; doi:10.1136/jitc-2020-001610), 2021-03-10

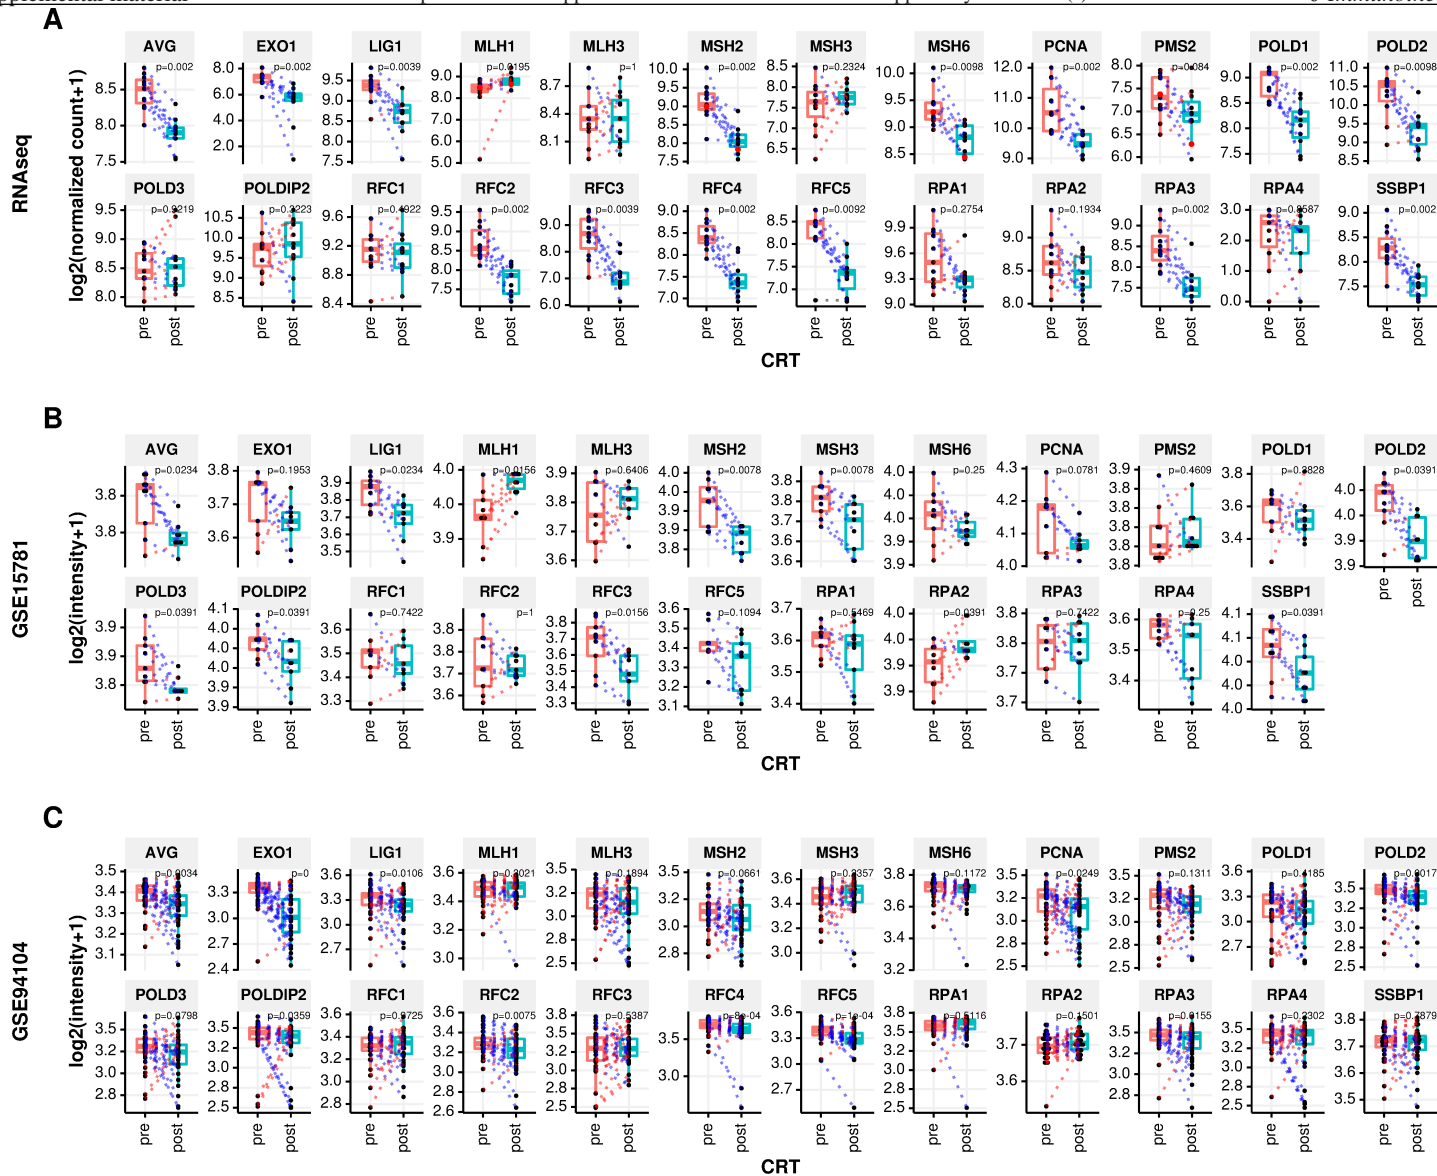

Supplement: jitc-2020-001610supp006.pdf [file jitc-2020-001610supp006.pdf]
